# Supplementary material for: Bottom-up microwave transformation of molecules to carbon dots for detection and encryption applications
Source: Royal Society of Chemistry journal article supplement (doi:10.1039/d5ra08943c), 2026-01-01
Supplement: d5ra08943c1.pdf [file d5ra08943c1.pdf]

## Bottom-up Microwave Transformation of Molecules to Carbon Dots for Detection and Encryption Applications

Arun Annamalai<sup>a,b</sup>, Sundaravadivel Elumalai<sup>c\*</sup>, Sambasivam Sangaraju<sup>b\*</sup>,

Fathy M. Hassan<sup>a,b\*</sup>

- a. Department of Chemistry, United Arab Emirates University, Al Ain - 15551, UAE.
- b. National Water and Energy Center, United Arab Emirates University, Al Ain 15551, UAE.
- c. HIDE- Laboratory, Department of Chemistry, Faculty of Engineering and Technology, SRM Institute of Science and Technology, Kattankulathur, Tamil Nadu, 603203, India.

\* Corresponding author's E-mail:

[sundaravadivelchem@gmail.com](mailto:sundaravadivelchem@gmail.com) ; [s\\_sambasivam@uaeu.ac.ae](mailto:s_sambasivam@uaeu.ac.ae); [f.hassan@uaeu.ac.ae](mailto:f.hassan@uaeu.ac.ae)

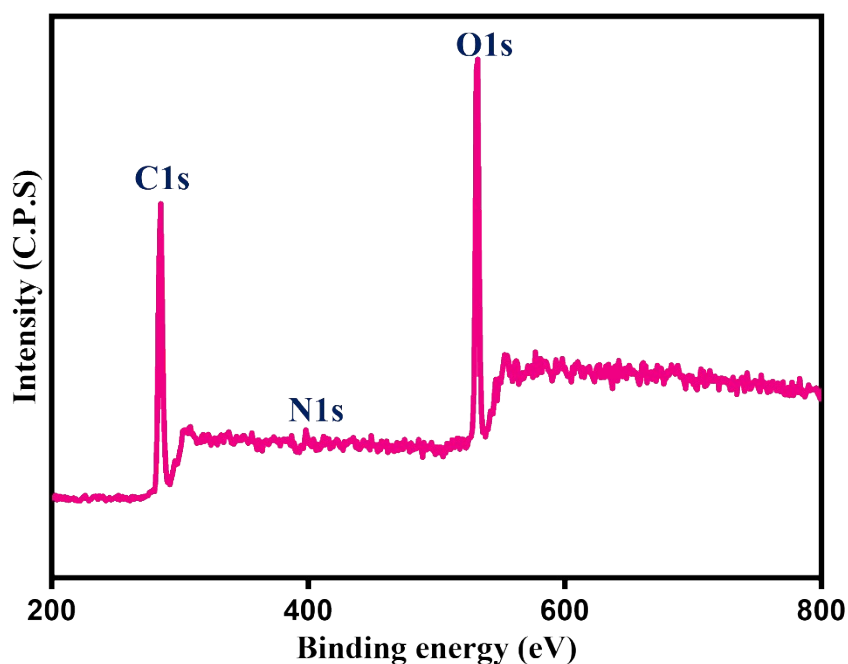

Figure S1: Survey spectra of CDs.

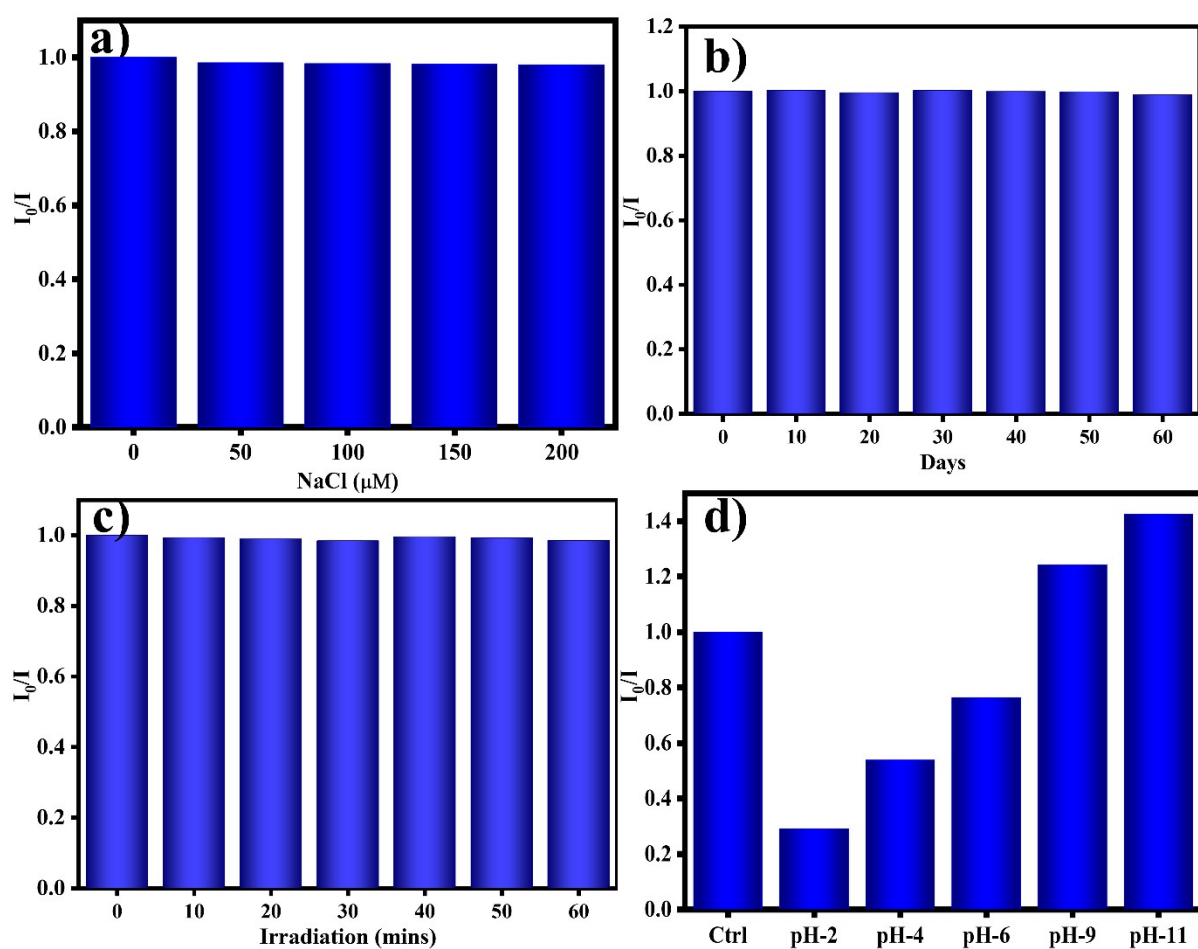

**Figure S2: Stability of CDs under a) Ionic environment, b) Long duration of storage c) UV-light irradiation, d) Different pH environment.**

**Table S1:**

**Table for comparing the present work LOD of Cr<sup>6+</sup> and Doc with already reported values based on fluorescence-based sensor probes.**

| Detection probe                            | Contaminant detected   | Linear range    | Detection Limit             | Reference        |
|--------------------------------------------|------------------------|-----------------|-----------------------------|------------------|
| <b>CDs</b>                                 | <b>Cr<sup>6+</sup></b> | <b>0-100 μM</b> | <b>0.14 μM<br/>(140 nM)</b> | <b>This Work</b> |
| N-CDs                                      | Cr <sup>6+</sup>       | 1-100 μM        | 0.12 μM                     | [1]              |
| CDs@Eu-MOFs                                | Cr <sup>6+</sup>       | 2-100 μM        | 0.21 μM                     | [2]              |
| N, S-CDs                                   | Cr <sup>6+</sup>       | 1-10 μM         | 0.2 μM                      | [3]              |
| CDs-Ws                                     | Cr <sup>6+</sup>       | 0-50 μM         | 106.57 nM                   | [4]              |
| CDs                                        | Cr <sup>6+</sup>       | 3-50 μM         | 0.09 μM                     | [5]              |
| Ru@CDs                                     | Cr <sup>6+</sup>       | 0-150 μM        | 0.128 μM                    | [6]              |
| CDs                                        | Cr <sup>6+</sup>       | 0-117 μM        | 0.11 μM                     | [7]              |
| CDs                                        | Doc                    | 10-1000 μM      | 16.35 μM                    | [8]              |
| CDs@CaF <sub>2</sub> :<br>Eu <sup>3+</sup> | Doc                    | 0.1-30 nM       | 43 nM                       | [9]              |
| S-Dots                                     | Doc                    | 0.5-25 μM       | 0.19 μM                     | [10]             |
| CDs                                        | Doc                    | 0.05-500<br>μM  | 18 nM                       | [11]             |
| S,N-CDs                                    | Doc                    | 0.5-500 μM      | 25 nM                       | [12]             |
| <b>CDs</b>                                 | <b>Doc</b>             | <b>0-90 μM</b>  | <b>0.09 μM<br/>(90 nM)</b>  | <b>This work</b> |

## References

- [1] M. Cao, Y. Li, Y. Zhao, C. Shen, H. Zhang, and Y. Huang, "A novel method for the preparation of solvent-free, microwave-assisted and nitrogen-doped carbon dots as fluorescent probes for chromium(VI) detection and bioimaging," *RSC Adv*, vol. 9, no. 15, pp. 8230–8238, Mar. 2019, doi: 10.1039/C9RA00290A.
- [2] Y. Wang, J. He, M. Zheng, M. Qin, and W. Wei, "Dual-emission of Eu based metal-organic frameworks hybrids with carbon dots for ratiometric fluorescent detection of Cr(VI)," *Talanta*, vol. 191, pp. 519–525, Jan. 2019, doi: 10.1016/J.TALANTA.2018.08.078.
- [3] H. Zhang, Y. Huang, Z. Hu, C. Tong, Z. Zhang, and S. Hu, "Carbon dots codoped with nitrogen and sulfur are viable fluorescent probes for chromium(VI)," *Microchimica Acta*, vol. 184, no. 5, pp. 1547–1553, May 2017, doi: 10.1007/S00604-017-2132-4/TABLES/2.
- [4] X. Ji *et al.*, "Green synthesis of weissella-derived fluorescence carbon dots for microbial staining, cell imaging and dual sensing of vitamin B12 and hexavalent chromium," *Dyes and Pigments*, vol. 184, p. 108818, Jan. 2021, doi: 10.1016/J.DYEPIG.2020.108818.
- [5] A. Annamalai, K. Annamalai, R. Ravichandran, S. Bharathkumar, and S. Elumalai, "Multi-functional carbon dots from simple precursors: An excellent heavy metal ions sensor with photocatalytic activity in aqueous environment," *Colloids Surf A Physicochem Eng Asp*, vol. 652, Nov. 2022, doi: 10.1016/j.colsurfa.2022.129800.
- [6] A. Annamalai, K. Annamalai, R. Ravichandran, A. K. Anilkumar, G. M R, and S. Elumalai, "Simple synthesis of water-soluble ruthenium carry CDs as admirable probe for improved environment and biological applications," *Mater Today Chem*, vol. 30, Jun. 2023, doi: 10.1016/j.mtchem.2023.101536.
- [7] K. Annamalai, A. Annamalai, R. Ravichandran, and S. Elumalai, "Recyclable waste Dry-cell batteries derived carbon dots (CDs) for detection of Two-fold metal ions and degradation of BTB dye," *Waste Management*, vol. 163, pp. 61–72, May 2023, doi: 10.1016/j.wasman.2023.03.032.
- [8] Q. Su, X. Wei, J. Mao, and X. Yang, "Carbon nanopowder directed synthesis of carbon dots for sensing multiple targets," *Colloids Surf A Physicochem Eng Asp*, vol. 562, pp. 86–92, Feb. 2019, doi: 10.1016/j.colsurfa.2018.11.015.
- [9] X. Tian and Z. Fan, "Novel ratiometric probe based on the use of rare earth-carbon dots nanocomposite for the visual determination of doxycycline," *Spectrochim Acta A Mol Biomol Spectrosc*, vol. 260, Nov. 2021, doi: 10.1016/j.saa.2021.119925.
- [10] Y. Zhuang *et al.*, "A ratiometric fluorescent probe based on sulfur quantum dots and calcium ion for sensitive and visual detection of doxycycline in food," *Food Chem*, vol. 356, Sep. 2021, doi: 10.1016/j.foodchem.2021.129720.
- [11] Y. Feng, L. Tan, Q. Tang, W. Zhong, and X. Yang, "Synthesis of Carbon Dots from PEG6000 and Papain for Fluorescent and Doxycycline Sensing," *Nano*, vol. 13, no. 9, Sep. 2018, doi: 10.1142/S1793292018501060.
- [12] J. Song *et al.*, "A novel fluorescent sensor based on sulfur and nitrogen co-doped carbon dots with excellent stability for selective detection of doxycycline in raw milk," *RSC Adv*, vol. 7, no. 21, pp. 12827–12834, 2017, doi: 10.1039/c7ra01074e.
